# Supplementary material
Source: publisher site journal article supplement (https://www.dovepress.com/article/618202)
Supplement: Supplementary file 1 [file 618202%20Supplementary%20Materials.docx]

**(Source Text)**

**Supplementary Appendix 1. Readiness to alter sun-protective behaviour questionnaire (RASP-B)**

**Please answer the following questions about sun exposure.**

**1. I don’t think I spend too much time exposed to the sun.**

a) ☐ Strongly disagree

b) ☐ Disagree

c) ☐ Neither agree nor disagree **Tick only one box**

d) ☐ Agree

e) ☐ Strongly agree

**2. I am trying to spend less time in the sun than I used to.**

a) ☐ Strongly disagree

b) ☐ Disagree

c) ☐ Neither agree nor disagree **Tick only one box**

d) ☐ Agree

e) ☐ Strongly agree

**3. I enjoy spending time in the sun, but sometimes I spend too much time in the sun.**

a) ☐ Strongly disagree

b) ☐ Disagree

c) ☐ Neither agree nor disagree **Tick only one box**

d) ☐ Agree

e) ☐ Strongly agree

**4. Sometimes I think I should spend less time in the sun.**

a) ☐ Strongly disagree

b) ☐ Disagree

c) ☐ Neither agree nor disagree **Tick only one box**

d) ☐ Agree

e) ☐ Strongly agree

**5. It’s a waste of time thinking about how much time I spend in the sun.**

a) ☐ Strongly disagree

b) ☐ Disagree

c) ☐ Neither agree nor disagree **Tick only one box**

d) ☐ Agree

e) ☐ Strongly agree

**6. I have just recently changed my sun-exposure habits.**

a) ☐ Strongly disagree

b) ☐ Disagree

c) ☐ Neither agree nor disagree **Tick only one box**

d) ☐ Agree

e) ☐ Strongly agree

**7. Anyone can talk about wanting to do something about reducing their sun exposure, but I am actually doing it.**

a) ☐ Strongly disagree

b) ☐ Disagree

c) ☐ Neither agree nor disagree **Tick only one box**

d) ☐ Agree

e) ☐ Strongly agree

**8. I am at the stage where I should think about spending less time in the sun.**

a) ☐ Strongly disagree

b) ☐ Disagree

c) ☐ Neither agree nor disagree **Tick only one box**

d) ☐ Agree

e) ☐ Strongly agree

**9. The amount of time I spend in the sun is a problem sometimes.**

a) ☐ Strongly disagree

b) ☐ Disagree

c) ☐ Neither agree nor disagree **Tick only one box**

d) ☐ Agree

e) ☐ Strongly agree

**10. There is no need for me to think about changing my sun-exposure habits.**

a) ☐ Strongly disagree

b) ☐ Disagree

c) ☐ Neither agree nor disagree **Tick only one box**

d) ☐ Agree

e) ☐ Strongly agree

**11. I am actually changing my sun-exposure habits right now.**

a) ☐ Strongly disagree

b) ☐ Disagree

c) ☐ Neither agree nor disagree **Tick only one box**

d) ☐ Agree

e) ☐ Strongly agree

**12. Spending less time in the sun would be pointless for me.**

a) ☐ Strongly disagree

b) ☐ Disagree

c) ☐ Neither agree nor disagree **Tick only one box**

d) ☐ Agree

e) ☐ Strongly agree

**ملحق 1. استبانة لتقييم جاهزية الفرد لتغيير سلوكيات الوقاية من الشمس (RASP-B)**

**يرجى إجابتك عن الأسئلة التالية بخصوص تعرضك للشمس**.

**1. لا أعتقد أنني اتعرض للشمس لفترات طويلة جدًا.**

أ) □ لا أوافق بشدة

ب) □ لا أوافق

ج) □ محايد **اختر مربعًا واحدًا فقط**

د) □ أوافق

هـ) □ أوافق بشدة

**2. أحاول قضاء وقت أقل في الشمس مقارنةً بما كنت أفعل سابقاً.**

أ) □ لا أوافق بشدة

ب) □ لا أوافق

ج) □ محايد **اختر مربعًا واحدًا فقط**

د) □ أوافق

هـ) □ أوافق بشدة

**3. أستمتع بقضاء الوقت في الشمس، لكنني أحيانًا أقضي وقتًا طويلاً جدًا فيها.**

أ) □ لا أوافق بشدة

ب) □ لا أوافق

ج) □ محايد **اختر مربعًا واحدًا فقط**

د) □ أوافق

هـ) □ أوافق بشدة

**4. أحيانًا أعتقد أن علي قضاء وقت أقل في الشمس.**

أ) □ لا أوافق بشدة

ب) □ لا أوافق

ج) □ محايد **اختر مربعًا واحدًا فقط**

د) □ أوافق

هـ) □ أوافق بشدة

**5. التفكير في مقدار الوقت الذي أقضيه في الشمس هو مجرد ضياع للوقت.**

أ) □ لا أوافق بشدة

ب) □ لا أوافق

ج) □ محايد **اختر مربعًا واحدًا فقط**

د) □ أوافق

هـ) □ أوافق بشدة

**6. لقد غيرت عاداتي المتعلقة بالتعرض للشمس مؤخرًا.**

أ) □ لا أوافق بشدة

ب) □ لا أوافق

ج) □ محايد **اختر مربعًا واحدًا فقط**

د) □ أوافق

هـ) □ أوافق بشدة

**7. يمكن لاي شخص أن يتحدث عن رغبته في القيام بأمرٍ ما لتقليل تعرضه للشمس، أما أنا فإنني أقلل تعرضي بالفعل.**

أ) □ لا أوافق بشدة

ب) □ لا أوافق

ج) □ محايد **اختر مربعًا واحدًا فقط**

د) □ أوافق

هـ) □ أوافق بشدة

**8. وصلت لمرحلة يجب علي فيها أن أفكر بقضاء وقت أقل في الشمس.**

أ) □ لا أوافق بشدة

ب) □ لا أوافق

ج) □ محايد **اختر مربعًا واحدًا فقط**

د) □ أوافق

هـ) □ أوافق بشدة

**9. يمثل مقدار الوقت الذي أقضيه في الشمس مشكلةً أحياناً.**

أ) □ لا أوافق بشدة

ب) □ لا أوافق

ج) □ محايد **اختر مربعًا واحدًا فقط**

د) □ أوافق

هـ) □ أوافق بشدة

**10. لا حاجة لي بأن أفكر في تغيير عاداتي المتعلقة بالتعرض للشمس.**

أ) □ لا أوافق بشدة

ب) □ لا أوافق

ج) □ محايد **اختر مربعًا واحدًا فقط**

د) □ أوافق

هـ) □ أوافق بشدة

**11. أنا بصدد تغيير عاداتي المتعلقة بالتعرض للشمس حالياً.**

أ) □ لا أوافق بشدة

ب) □ لا أوافق

ج) □ محايد **اختر مربعًا واحدًا فقط**

د) □ أوافق

هـ) □ أوافق بشدة

**12. سيكون قضائي لوقتٍ أقل في الشمس بلا فائدة بالنسبة لي.**

أ) □ لا أوافق بشدة

ب) □ لا أوافق

ج) □ محايد **اختر مربعًا واحدًا فقط**

د) □ أوافق

هـ) □ أوافق بشدة
